# Supplementary material for: The Dual Roles of Triiodothyronine in Regulating the Morphology of Hair Cells and Supporting Cells during Critical Periods of Mouse Cochlear Development
Source: MDPI journal article supplement (doi:10.3390/ijms24054559), 2023-02-25
Supplement: s1 [file s1]

**Table S1.** The primers for real-time qPCR were as follows:

| Gene Name | Forward (5'–3')         | Reverse (5'–3')         |
|-----------|-------------------------|-------------------------|
| GAPDH     | GAAGGTCGGTGTGAACGGAT    | CTCGCTCCTGGAAGATGGTG    |
| Gfi1      | AGAAGGCGCACAGCTATCAC    | GGCTCCATTTTCGACTCGC     |
| Pou4f3    | CGACGCCACCTACCATAACC    | CCCTGATGTACCGCGTGAT     |
| Neurog1   | CCAGCGACACTGAGTCCTG     | CGGGCCATAGGTGAAGTCTT    |
| Atoh1     | ATGCACGGGCTGAACCA       | TCGTTGTTGAAGGACGGGATA   |
| Sox2      | CTGTTTTTTCATCCCAATTGCA  | CGGAGATCTGGCGGAGAATA    |
| Notch1    | CCGTGTAAGAATGCTGGAACG   | AGCGACAGATGTATGAAGACTCA |
| Notch2    | ATGTGGACGAGTGTCTGTTGC   | GGAAGCATAGGCACAGTCATC   |
| Notch3    | TGCCAGAGTTCAGTGGTGG     | CACAGGCAAATCGGCCATC     |
| Jag1      | ATGCAGAACGTGAATGGAGAG   | GCGGGACTGATACTCCTTGAG   |
| Jag2      | CAATGACACCACTCCAGATGAG  | GGCCAAAGAAGTCGTTGCG     |
| Hey1      | CCGACGAGACCGAATCAATAAC  | TCAGGTGATCCACAGTCATCTG  |
| Hey2      | AAGCGCCCTTGTGAGGAAA     | TCGCTCCCCACGTCGAT       |
| HeyL      | GCGCAGAGGGATCATAGAGAA   | TCGCAATTCAGAAAGGCTACTG  |
| Hes1      | GCTTCAGCGAGTGCATGAAC    | CGGTGTTAACGCCCTCACA     |
| Hes5      | GGCGGTGGAGATGCTCAGT     | GCTGCTCTATGCTGCTGTTGA   |
| Dll1      | CAGGACCTTCTTTCGCGTATG   | AAGGGGAATCGGATGGGGTT    |
| Dll4      | TTCCAGGCAACCTTCTCCGA    | ACTGCCGCTATTCTTGTCCC    |
| Fgf8      | AGAGCCTGGTGACGGATCA     | CTTCCAAAAGTATCGGTCTCCAC |
| Fgf10     | TCAGCGGGACCAAGAATGAAG   | CGGCAACAACCTCCGATTTC    |
| Fgf20     | AGGATCACAGTCTCTTCGGTATC | GTCATTCATCCCAAGGTACAGG  |
| Tgfb1     | TCCCAACTACAGGACCTTTTCA  | GCAGTGGTAAACCTGATCCAGA  |
| Tgfb2     | CCGCTGCATATCGTCCTGTG    | AGTGGATGGATGGTCCTATTACA |
| Smad2     | ATGTCGTCCATCTTGCCATTC   | AACCGTCCTGTTTTCTTTAGCTT |
| Smad3     | CACGCAGAACGTGAACACC     | GGCAGTAGATAACGTGAGGGA   |
| Smad4     | ACACCAACAAGTAACGATGCC   | GCAAAGGTTTCACTTTCCCCA   |
| Smad7     | GGCCGGATCTCAGGCATTC     | TTGGGTATCTGGAGTAAGGAGG  |
| Bmpr1a    | AACAGCGATGAATGTCTTCGAG  | GTCTGGAGGCTGGATTATGGG   |
| Bmpr1b    | CCCTCGGCCCAAGATCCTA     | CAACAGGCATTCCAGAGTCATC  |
| Bmpr2     | TTGGGATAGGTGAGAGTCGAAT  | TGTTTCACAAGATTGATGTCCCC |
| Ltp1      | CCAGTCCCAAGTCTCTTACCA   | CTGGAAGCATCGGCCAAGT     |
| Ctnnb1    | ATGGAGCCGGACAGAAAAGC    | CTTGCCACTCAGGGAAGGA     |
| Lgr5      | TCTTCACCTCCTACCTGGACCT  | GGCGTAGTCTGCTATGTGGTGT  |
| Axin1     | CTCCAAGCAGAGGACAAAATCA  | GGATGGGTTCACACAGAAATA   |
| Axin2     | TGACTCTCCTTCCAGATCCCA   | TGCCACACTAGGCTGACA      |
| Myc       | ATGCCCCTCAACGTGAACTTC   | GTCGCAGATGAAATAGGGCTG   |
| Ccnd2     | GAGTGGGAACTGGTAGTGTG    | CGCACAGAGCGATGAAGGT     |
| Wnt2b     | GACACGTCCTGGTGGTACATA   | GTCTGGGTAGCGTTGACACA    |
| Dkk2      | ACCCGCTGCAATAATGGAATC   | ATGGTTGCGATCTCTATGCCG   |
| Cdk2      | CCTGCTTATCAATGCAGAGGG   | GTGCTGGGTACACACTAGGTG   |
| Cdk4      | ATGGCTGCCACTCGATATGAA   | TGCTCCTCCATTAGGAACTCTC  |
| Cdk6      | TCTCACAGAGTAGTGCATCGT   | CGAGGTAAGGGCCATCTGAAAA  |
| Cdc25a    | ACAGCAGTCTACAGAGAATGGG  | GATGAGGTGAAAGGTGTCTTGG  |
| Cdc25b    | TCCGATCCTTACCAGTGAGG    | GGTCTCTGGAAGCGCACATT    |
| Cdc25c    | ATGTCTACAGGACCTATCCCAC  | ACCTAAACTGGGTGCTGAAAC   |
| Cdkn1a    | CCTGGTGATGTCCGACCTG     | CCATGAGCGCATCGCAATC     |
| Tfdp1     | TTGAAGCCAACGGAGAATAAAG  | TGGAAGGTGTCGGAAGGTTTTTG |
